# Supplementary material
Source: Springer Nature journal article supplement (https://www.springerprofessional.de/resource/supplementary/40095_2012_52_MOESM8_ESM.pdf/11899726)

# Moisture Cont. (dry Basis) Vs Time (Hrs)

## Material Grapes

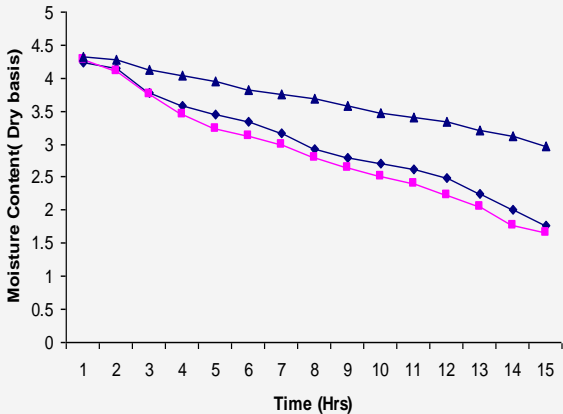

—◆— Smooth Plate —■— Rough Plate —▲— Natural drying

Supplement: MOESM8 [file 11899726]
